# Supplementary material
Source: PubMed Central journal article supplement (PMC2825598)
Supplement: 97320630004169S1.pdf [file 97320630004169S1.pdf]

## Supplementary material:

**Table 1:** Regulatory information collected in ShewRegDB

| Source         | Class of the Regulatory Element                         | Number of Elements | Number of Sites | Computational predictions(C) /Manual annotation (M) | Reference                                           |
|----------------|---------------------------------------------------------|--------------------|-----------------|-----------------------------------------------------|-----------------------------------------------------|
| TractorDB      | DNA regulator Binding Site                              | 20                 | 589             | C                                                   | [5]                                                 |
| RegTransBase   | DNA regulator Binding Site                              | 5                  | 36              | M                                                   | [24]                                                |
| WUSTL          | DNA regulator Binding Site                              | 23                 | 97              | C                                                   | [6]                                                 |
| ShewRegDB      | DNA regulator Binding Site                              | 3                  | 359             | M                                                   |                                                     |
| PromScan       | DNA regulator Binding Site (Sigma Factor Binding Sites) | 1                  | 383             | C                                                   | [23]                                                |
| Rfam           | RNA regulator (ncRNA)                                   | 17                 | 135             | C                                                   | [7]                                                 |
| RibEx          | RNA regulator (RLEs)                                    |                    | 129             | C                                                   | [8]                                                 |
| WUSTL (RSSVM)  | RNA regulator (ncRNA)                                   |                    | 953             | C                                                   | [25]                                                |
| RibEx          | RNA regulator (Attenuators)                             |                    | 1767            | C                                                   | [8]                                                 |
| TransTermHP    | RNA regulator (rho-independent terminators)             |                    | 81457           | C                                                   | [9]                                                 |
| MicrobesOnline | Operon                                                  | 2601               |                 | C                                                   | [22]                                                |
| ODB            | Operon                                                  | 856                |                 | C                                                   | [26]                                                |
| Shewybase      | Operon                                                  | 406                |                 | C                                                   | Michael Molla, Tim Gardner , personal communication |
| ShewCyc        | Operon                                                  | 2968               |                 | C                                                   | [27]                                                |
| DOOR           | Operon                                                  | 2773               |                 | C                                                   | [28]                                                |
| MESS           | Operon                                                  | 2943               |                 | M                                                   | Margaret R. Romine, personal communication          |
